# Supplementary material for: Dopamine D4 Receptor Gene Associated with Fairness Preference in Ultimatum Game
Source: PLoS One. 2010 Nov 3;5(11):e13765. doi: 10.1371/journal.pone.0013765 (PMC2972208; doi:10.1371/journal.pone.0013765)
Supplement: Dataset S1 — The data Set includes the behavior of the proposer and responder, and information about sex, season, temperature, and school (0.03 MB XLS) [file pone.0013765.s001.xls]

## Sheet: Sheet2
Player1	Player2	d4	sex	season	temperature	school
0	0	1	1	1	30.9	2
0	10	1	1	0	10.1	10
0	0	1	1	1	30.2	3
1	1	1	0	0	19.1	11
1	1	0	0	1	26	4
1	0.1	1	1	0	19.1	11
1	1	1	0	0	5	7
4	4	1	0	0	3.7	9
4	1	1	0	1	30.9	2
5	10	1	0	1	29.7	1
5	8	0	0	0	3.7	9
5	5	1	0	1	30.9	2
5	1	0	1	0	3.7	9
5	5	0	1	1	20.3	5
5	5	1	0	.	.	.
5	5	1	0	1	30.2	3
5	5	0	1	0	19.1	11
5	10	1	1	0	5	7
5	10	1	0	1	30.9	2
5	10	1	1	0	3.7	9
5	5	0	1	1	26	4
5	1	0	0	1	30.2	3
5	5	0	1	0	10.1	10
5	5	1	1	0	11.6	6
5	5	.	0	0	19.1	11
5	1	0	1	0	5	7
5	10	1	1	0	5	7
6	5	0	1	0	3.7	9
6	7	0	0	1	25.8	12
7	5	1	0	0	1.8	8
7	10	0	1	1	30.9	2
7	1	0	1	0	19.1	11
8	6	0	1	1	26	4
8	5	0	1	0	1.8	8
8	5	1	1	0	19.1	11
8	5	.	0	0	3.7	9
8	1	0	1	0	19.1	11
8	8	1	1	0	1.8	8
8	5	0	0	1	29.7	1
8	5	1	0	1	26	4
8	8	0	1	0	10.1	10
8	8	0	1	1	25.8	12
8	2	1	0	0	19.1	11
8	8	0	1	0	1.8	8
8	8	1	1	0	5	7
8	5	1	1	0	3.7	9
8	10	.	0	0	10.1	10
8	8	1	1	0	19.1	11
8	8	0	1	0	19.1	11
8	10	0	1	1	26	4
8	8	1	0	0	11.6	6
9	5	0	0	1	30.2	3
9	1	0	0	0	1.8	8
9	1	1	0	0	10.1	10
9	5	0	1	0	3.7	9
10	5	1	1	1	30.9	2
10	5	0	1	1	25.8	12
10	10	1	1	1	25.8	12
10	8	0	1	0	11.6	6
10	5	0	1	0	11.6	6
10	8	0	0	1	30.2	3
10	9	1	0	0	3.7	9
10	8	0	0	0	19.1	11
10	5	1	0	1	20.3	5
10	8	1	0	0	10.1	10
10	5	1	1	1	26	4
10	0	1	0	0	11.6	6
10	5	.	0	1	26	4
10	10	1	1	0	10.1	10
10	5	0	1	0	11.6	6
10	10	.	1	0	19.1	11
10	10	.	1	1	29.7	1
10	10	1	1	1	25.8	12
10	1	1	1	1	30.9	2
10	0	.	1	1	25.8	12
10	0	0	1	1	20.3	5
10	8	1	1	0	3.7	9
10	5	1	1	1	30.9	2
10	5	0	1	0	1.8	8
10	5	0	0	0	5	7
10	5	0	1	0	1.8	8
10	5	0	0	1	30.9	2
10	10	1	0	1	30.9	2
10	10	1	0	0	10.1	10
10	10	1	0	0	10.1	10
10	1	0	1	0	1.8	8
10	0	0	1	1	25.8	12
10	0	1	1	1	30.2	3
10	10	1	0	0	19.1	11
10	8	1	1	1	30.2	3
10	10	1	1	1	20.3	5
10	10	0	0	0	11.6	6
10	8	1	0	0	1.8	8
10	10	0	0	0	11.6	6
10	0.1	1	1	1	26	4
10	10	1	1	1	30.2	3
10	10	1	0	1	30.9	2
10	10	1	0	1	30.2	3
10	10	1	0	0	10.1	10
10	8	1	0	0	5	7
10	9	0	0	1	20.3	5
10	10	1	1	0	10.1	10
10	5	1	1	0	19.1	11
10	8	0	1	1	30.2	3
10	10	1	1	0	3.7	9
10	0	0	1	1	25.8	12
10	10	1	0	1	29.7	1
10	10	1	0	1	20.3	5
10	5	.	1	1	29.7	1
10	10	0	1	0	10.1	10
10	5	1	1	0	5	7
10	5	0	0	1	30.9	2
10	5	1	0	0	19.1	11
10	0	0	1	0	3.7	9
10	10	1	1	0	19.1	11
10	10	1	0	0	19.1	11
10	10	0	0	0	11.6	6
10	0	0	0	1	30.2	3
10	10	0	0	1	29.7	1
10	5	0	0	0	1.8	8
10	10	0	1	0	5	7
10	1	.	1	0	11.6	6
10	5	.	0	1	26	4
10	10	1	0	1	25.8	12
10	5	1	0	0	19.1	11
10	0	0	1	0	5	7
10	10	1	0	0	5	7
10	10	1	0	1	26	4
10	10	1	0	1	29.7	1
10	10	0	1	1	26	4
10	0	.	0	0	5	7
10	5	0	0	1	20.3	5
10	10	1	0	1	30.9	2
10	8	.	0	1	29.7	1
10	10	0	0	1	30.9	2
10	8	.	1	0	5	7
10	10	1	1	0	19.1	11
10	8	1	1	0	5	7
10	10	.	0	0	1.8	8
10	0	1	1	1	25.8	12
10	5	.	0	0	10.1	10
10	0	1	1	1	25.8	12
10	7	1	1	1	20.3	5
10	5	1	0	0	3.7	9
10	8	1	0	1	25.8	12
10	5	1	1	0	19.1	11
10	5	0	1	0	3.7	9
10	5	.	1	0	3.7	9
10	5	1	1	1	25.8	12
10	10	1	1	0	1.8	8
10	0	1	1	1	26	4
10	5	0	1	0	19.1	11
10	5	.	0	1	20.3	5
10	10	0	0	1	30.2	3
10	10	.	0	1	30.9	2
10	5	0	0	0	19.1	11
10	10	1	0	1	29.7	1
10	8	1	0	1	26	4
10	10	1	1	0	3.7	9
10	1	1	0	0	1.8	8
10	8	1	1	0	11.6	6
10	10	1	1	0	19.1	11
10	0	.	1	1	29.7	1
10	8	1	0	1	20.3	5
10	5	1	1	0	1.8	8
10	9	1	0	1	30.2	3
10	1	0	0	0	1.8	8
10	5	0	1	1	29.7	1
10	3	0	1	0	1.8	8
10	10	1	1	0	1.8	8
10	5	1	1	0	11.6	6
10	5	0	1	0	10.1	10
10	5	0	1	0	1.8	8
10	10	1	0	1	30.9	2
10	5	1	0	0	3.7	9
10	5	1	1	0	19.1	11
10	10	1	0	1	26	4
10	5	1	0	1	30.2	3
10	8	0	0	1	30.2	3
10	0	0	1	1	20.3	5
10	6	1	0	1	30.2	3
10	8	0	1	1	30.2	3
10	10	0	1	1	25.8	12
10	10	1	0	1	30.2	3
10	0	1	1	1	30.9	2
10	5	1	1	1	29.7	1
10	10	1	1	0	3.7	9
10	10	1	0	0	11.6	6
10	10	1	0	1	25.8	12
10	9	1	1	1	30.2	3
10	5	.	1	1	29.7	1
10	0	0	1	0	1.8	8
10	10	1	0	1	30.2	3
10	1	1	1	1	25.8	12
10	1	1	1	1	29.7	1
10	1	0	1	1	30.9	2
11	1	1	0	0	19.1	11
11	9	0	1	1	26	4
11	10	0	1	0	5	7
12	8	1	1	0	11.6	6
12	5	0	0	1	29.7	1
12	10	1	0	1	29.7	1
12	1	0	0	0	10.1	10
13	5	.	1	0	19.1	11
15	2	.	1	1	30.2	3
15	10	1	1	0	19.1	11
15	0	1	0	1	20.3	5
20	.	0	0	1	30.2	3
